# 1 Identification of miRNA signatures for kidney renal 2 clear cell carcinoma using the tensor-decomposition 3 method

4 Ka-Lok Ng <sup>1,2</sup> and Y-h Taguchi <sup>3,\*</sup>

5 <sup>1</sup> Department of Bioinformatics and Medical Engineering Asia University, Taichung, Taiwan;  
6 ppiddi@gmail.com

7 <sup>2</sup> Department of Medical Research, China Medical University Hospital China Medical University, Taiwan

8 <sup>3</sup> Department of Physics Chuo University, 1-13-27 Kasuga Bunkyo-ku, Tokyo 112-8551, Japan;  
9 tag@granular.com

10 \* Correspondence: [tag@granular.com](mailto:tag@granular.com), ORCID ID: 0000-0003-0867-8986

11

## 12 Abstract:

13 **Purpose** Cancer is a highly complex disease caused by multiple genetic factors. MicroRNA (miRNA)  
14 and mRNA expression profiles are useful for identifying prognostic biomarkers for cancer. The  
15 kidney renal clear cell carcinoma (KIRC) was selected for our analysis, because KIRC accounts for  
16 more than 70% of all renal malignant tumor cases.

17 **Methods** Traditional methods of identifying cancer prognostic markers may not be accurate. Tensor  
18 decomposition (TD) is a useful method uncovering the underlying low-dimensional structures in  
19 the tensor. TD-based unsupervised feature extraction method was applied to analyze mRNA and  
20 miRNA expression profiles. Biological annotations of the prognostic miRNAs and mRNAs were  
21 examined by utilizing pathway and oncogenic signature databases, i.e. DIANA-miRPath and  
22 MSigDB.

23 **Results** TD identified the miRNA signatures and the associated genes. These genes were found to  
24 be involved in cancer-related pathways and 23 genes were significantly correlated with the survival  
25 of KIRC patients. We demonstrated that the results are robust and not highly dependent upon the  
26 database we selected. Compare to the t-test, we shown that TD achieves a much better performance  
27 in selecting prognostic miRNAs and mRNAs.

28 **Conclusion** These results suggest that integrated analysis using the TD-based unsupervised feature  
29 extraction technique is an effective strategy for identifying prognostic signatures in cancer studies.

30 **Keywords:** cancer biomarkers, diagnostic markers, prognostic markers, microRNA signatures,  
31 kidney cancer, tensor decomposition

32

---

## 33 Acknowledgments

34 Dr. Ka-Lok Ng is funded by the Ministry of Science and Technology, Taiwan (MOST), grant number MOST 108-  
35 2221-E-468-020, and also supported by the Asia University, grant numbers 107-asia-02 and 107-asia-09. Dr. Y-h  
36 Taguchi is supported by Kakenhi 19H05270 and 17K00417. We would like to thank Editage ([www.editage.com](http://www.editage.com))  
37 for English language editing.

38

39

40

41

## 42 1. Introduction

43 Cancer is a highly complicated and heterogeneous disease. It is the result of a loss of cell cycle  
44 control (Vargas-Rondon, Villegas, & Rondon-Lagos, 2017), which is due to accumulation of genetic  
45 mutations, gene duplication (Hanahan & Weinberg, 2011), and aberrant epigenetic regulation  
46 (Feinberg & Vogelstein, 1983; Rouhi, Mager, Humphries, & Kuchenbauer, 2008). Genetic mutations  
47 involving activation of proto-oncogenes to oncogenes (OCG) and inactivation of tumor-suppressing  
48 genes (TSG) may cause cancer by alternating transcription factors (TF), such as the *p53* and *ras*  
49 oncoproteins, which in turn control the expression of other genes. Gene duplication causes an  
50 elevated level of its protein product and thus favor the proliferation of cancer cells. MicroRNAs  
51 (miRNAs) are a class of small non-coding RNAs that bind to the messenger RNA (mRNA) and induce  
52 either its cleavage or impede translation repression. Several studies have indicated that abnormal  
53 miRNA expression is associated with carcinogenesis (Medina & Slack, 2008). miRNAs induce cancers  
54 by acting as oncogenes (OCG) and tumor suppressor genes (TSG). An miRNA that targets the mRNA  
55 of a TSG would induce loss of the protective effect of the TSG (Medina & Slack, 2008; Zhang,  
56 Dahlberg, & Tam, 2007). Although there have been many advancements in cancer therapy and  
57 diagnosis, many patients are unable to recover or experience recurrence after treatment. Accordingly,  
58 miRNA expression profiles are useful for identifying prognostic biomarkers for cancer diagnosis. For  
59 instance, dysregulated miRNAs were identified in urothelial carcinoma of the bladder (Inamoto et  
60 al., 2018). Recent studies also suggested that miRNAs could be used as a prognostic biomarker for  
61 patients with pancreatic adenocarcinoma (Shi et al., 2018; Yu, Feng, & Cang, 2018). Furthermore, by  
62 utilizing meta-analysis, it was reported that a panel of eight-miRNA signatures could serve as an  
63 effective marker for predicting overall survival in bladder cancer patients (Zhou et al., 2015). In this  
64 study, we selected kidney renal clear cell carcinoma (KIRC) for our analysis. KIRC is the most  
65 common cancer subtype of all renal malignant tumors, accounting for more than 70% of the cases  
66 (Zhang et al. 2013). Several studies have identified a few miRNA signatures that are associated with  
67 the overall survival of KIRC patients (Lokeshwar et al., 2018; Luo et al., 2019; Xie et al., 2018).

68 Typical data structures in bioinformatics are difficult to analyze because of the small number of  
69 samples with many variables. Supervised feature extraction are effective methods for reducing the  
70 number of features. If supervised learning is applied, overfitting can occur. Regularization (sparse  
71 modeling) attempts to minimize the number of features by restricting the sum of coefficients  
72 attributed to features and penalizes the use of additional variables. The disadvantage of  
73 regularization is that we must select the values of parameters that balance the prediction accuracy  
74 and the number of variables. There are two major issues with supervised feature extraction methods:  
75 (i) class labels may not always be true and (ii) there may be more class labels present in the dataset.  
76 However, unsupervised methods such as principal component analysis (PCA) are often used to  
77 generate a smaller number of variables through the linear combination of original variables. The  
78 problem with this approach is that the linear combination of many variables often prevents us from  
79 interpreting the newly generated variables. An unsupervised methodology that is suitable for the  
80 dimension reduction problems is tensor decomposition (TD)-based unsupervised feature extraction  
81 (FE) (Y. Taguchi, 2017; Y. Taguchi & Ng, 2018; Y.-h. Taguchi, 2019a, 2019b, 2019c; Y.-h. Taguchi & T.  
82 Turki, 2019; Y. H. Taguchi, 2017a, 2017b, 2017c, 2018a, 2018b, 2018c, 2019; Y. H. Taguchi & T. Turki,  
83 2019). This method allows selection of a smaller number of variables effectively and stably.

## 84 2. Materials and Methods

### 85 2.1 Tensors and tensor decomposition (TD)

86 Tensor [17] is a mathematical structure for storing datasets associated with more than two  
87 properties. If we measure miRNA and mRNA expression for the samples, we cannot avoid storing  
88 these two measurements into two separate matrices. However, by using tensor we can store these

89 two datasets into a tensor, because tensors can have more than two suffixes, which matrices do not  
90 have.

91 TD [17] is a mathematical trick that can approximate tensors as the summation of series whose  
92 terms are expressed via the outer product of vectors, each of which represent individual property  
93 (in this specific example, these vectors correspond to mRNAs, miRNAs, and samples) .

## 94 2.2. Tensor decomposition method

95 The miRNAseq and mRNAseq expression data for KIRC were retrieved from the TCGA Data  
96 Portal Research Network (<https://gdcportal.nci.nih.gov/>).

97 TD is a natural extension of matrix factorization, and is regarded as a generalization of the  
98 singular value decomposition (SVD) method. It is a useful technique uncovering the underlying low-  
99 dimensional structures in the tensor. There are two popular tensor decomposition algorithms:  
100 canonical polyadic decomposition (CPD) and Tucker decomposition (Rabanser, Shchur, &  
101 Günnemann, 2017). The rank decomposition method, CPD, is to express a tensor as the sum of a finite  
102 number of rank-one tensors. The Tucker decomposition decomposes a tensor into a so-called core  
103 tensor and multiple matrices.

104 TD-based unsupervised FE was applied to analyze mRNA and miRNA expression profiles. Let  
105  $x_{ij}^{(mRNA)}$  denote the expression profiles of the  $i$ th mRNA ( $i = 1, \dots, N$ ) of the  $j$ th sample ( $j = 1, \dots, M$ ),  
106 whereas  $x_{kj}^{(miRNA)}$  denotes the expression profiles of the  $k$ th miRNA ( $k = 1, \dots, K$ ) of the  $j$ th sample ( $j =$   
107  $1, \dots, M$ ). Both  $x_{ij}$  and  $x_{kj}$  will be standardized such that they are associated with zero mean and unit  
108 variance. Next, we generated a case II type I tensor, that is,

$$109 \quad x_{ijk} = x_{ij}^{(mRNA)} * x_{kj}^{(miRNA)} \quad (1)$$

110  $x_{ijk}$  is subjected to Tucker decomposition as follows:

$$111 \quad x_{ijk} = \sum_{l_1=1}^N \sum_{l_2=1}^M \sum_{l_3=1}^K G(l_1, l_2, l_3) u_{l_1 i} u_{l_2 j} u_{l_3 k} \quad (2)$$

112 where  $G \in R^{N \times M \times K}$  is the core tensor and  $u_{l_1 i} \in R^{N \times N}$ ,  $u_{l_2 j} \in R^{M \times M}$  and  $u_{l_3 k} \in R^{K \times K}$  are singular  
113 value matrices that are orthogonal. Because Tucker decomposition is not unique, we have to specify  
114 how Tucker decomposition was derived. In particular, we chose higher-order singular value  
115 decomposition (HOSVD). Given that  $x_{ijk}$  is too large to apply TD, we generated a case II type II tensor,  
116 which is given by:

$$117 \quad x_{ik} = \sum_{j=1}^M x_{ijk} \quad (3)$$

118 By applying SVD, we can get  $u_{l_1 i}$  and  $u_{l_3 k}$  as

$$119 \quad x_{ik} = \sum_{l=l_1=l_3=1}^{\min(N,K)} \lambda_l u_{l_1 i} u_{l_3 k} \quad (4)$$

120 Then, we can also obtain two  $u_{l_2 j}$  that correspond to miRNA and mRNA expression:

$$121 \quad u_{l_1 j}^{mRNA} = \sum_{i=1}^N x_{ij} u_{l_1 i}, \quad u_{l_3 j}^{miRNA} = \sum_{k=1}^K x_{kj} u_{l_3 k}, \quad (5)$$

122 Selection of genes can be determined using the following quantities,

$$123 \quad p_i = p_{\chi^2} \left[ > \left( \frac{u_{l_1 i}}{\sigma_{l_1}} \right)^2 \right], p_k = p_{\chi^2} \left[ > \left( \frac{u_{l_3 k}}{\sigma_{l_3}} \right)^2 \right] \quad (6)$$

124 where  $p_{\chi^2}[>x]$  is the cumulative probability that the argument is greater than  $x$  in a  $\chi^2$  distribution.

125  $\sigma_{l_1}$  and  $\sigma_{l_3}$  denote the standard deviations for  $u_{l_1 i}$  and  $u_{l_3 k}$ , respectively. After the P-values  
126 are adjusted by means of the Benjamini–Hochberg (BH) criterion, miRNAs and mRNAs that are  
127 associated with adjusted P-values less than 0.01 are selected as those showing differences in expression

128 between controls (normal tissues) and treated samples (tumors).

129

### 130 2.3 mRNA and miRNA expression

131 Expression profiles of the mRNA and miRNA were retrieved from TCGA. The samples consisted  
132 of 253 kidney tumors and 71 normal kidney tissues ( $M = 324$ ). The number of mRNAs measured was  
133  $N = 19536$ , and the number of measured miRNAs was  $K = 825$ .

134 Another dataset was downloaded from GEO with GEO ID GSE16441, and two files, GSE16441-  
135 GPL6480\_series\_matrix.txt.gz (for mRNA) and SE16441-GPL8659\_series\_matrix.txt.gz (for miRNA)  
136 were used. A total of  $N = 33698$  mRNAs and  $K = 319$  miRNAs were measured for 17 patients and 17  
137 healthy controls ( $M = 34$ ).

138

### 139 2.4 Analysis of the correlation between miRNA and gene expression

140 Correlations between  $u_{l_1j}^{mRNA}$  and  $u_{l_3j}^{miRNA}$  ( $l_1 = l_3 = 2$ ) were quantified by the Pearson's correlation  
141 coefficient (*PCC*). The *PCC* and P-values were calculated using the *corr.function* and *cor.test* function in  
142 the R software, respectively.

### 143 2.5. Biological function analysis

144 We evaluated the biological significance of the set of differentially expressed miRNAs and their  
145 correlated mRNAs. Biological annotations of the prognostic miRNAs and mRNAs were examined by  
146 employing the DIANA-miRPath (Vlachos et al., 2015) and MSigDB (Liberzon et al., 2015) databases,  
147 respectively.

## 148 3. Results

149 We applied TD-based unsupervised FE to the KIRC dataset retrieved from TCGA. It was found  
150 that  $u_{l_1j}^{mRNA}$  and  $u_{l_3j}^{miRNA}$  ( $l_1 = l_3 = 2$ ) varied between the normal and tumor samples. The t-test derived  
151 P-values were  $7.10 \times 10^{-39}$  for mRNA and  $2.13 \times 10^{-71}$  for miRNA, respectively. In order to see if  
152  $u_{2j}^{mRNA}$  and  $u_{2j}^{miRNA}$  are significantly correlated, we computed the *PCC* between them, which was 0.905  
153 ( $P = 1.63 \times 10^{-121}$ ), indicating that they are highly correlated.

154

155 The results of the miRNA signatures and their significant correlated genes are shown in Table 1.  
156 A total of 11 miRNAs and 72 genes were identified. To determine if these miRNAs and mRNAs are  
157 significantly correlated, we computed the *PCC* for all  $11 \times 72 = 792$  pairs. Among them, 353 pairs  
158 were positively correlated and 358 pairs were negatively correlated (P-values were less than 0.01 after  
159 correcting with the BH criterion). Therefore, 90% of pairs are significantly correlated. Moreover, we  
160 could successfully identify significantly correlated pairs of miRNAs and mRNAs. We noted that  
161 among the predicted 11 miRNAs, one miRNA (miR-155) matched the result reported by Lokeshwar  
162 et al. (Lokeshwar et al., 2018).

163

164 **Table 1.** The results of the miRNA signatures and genes of KIRC patients based on the TD analysis.

| miRNA ID    |               |               |               |             |             |
|-------------|---------------|---------------|---------------|-------------|-------------|
| hsa-mir-210 | hsa-mir-891a  | hsa-mir-155   | hsa-mir-200c  | hsa-mir-141 | hsa-mir-508 |
| hsa-mir-122 | hsa-mir-514-3 | hsa-mir-514-1 | hsa-mir-514-2 | hsa-mir-184 |             |
| Gene symbol |               |               |               |             |             |
| ACTG1       | ADAM6         | AIF1L         | ALDOA         | ALDOB       | ANGPTL4     |
| APLP2       | APP           | AQP1          | AQP2          | ASS1        | ATP1A1      |

|         |          |         |          |          |          |
|---------|----------|---------|----------|----------|----------|
| ATP1B1  | ATP5A1   | ATP5B   | B2M      | C3       | C4A      |
| C7      | CA12     | CCND1   | CD74     | CDH16    | COL4A1   |
| COL4A2  | CP       | CYFIP2  | ENO1     | FN1      | FTL      |
| GAPDH   | GATM     | GNB2L1  | GPX3     | HLA-A    | HLA-B    |
| HLA-C   | HLA-DRA  | HSD11B2 | HSP90AA1 | HSPA8    | IGFBP3   |
| IGFBP5  | ITM2B    | KNG1    | LDHA     | LDHB     | LOC96610 |
| NDRG1   | NDUFA4L2 | NNMT    | P4HB     | PCK1     | PEBP1    |
| PLIN2   | PLVAP    | PODXL   | RGS5     | SERPINA1 | SLC12A1  |
| SLC12A3 | SOD2     | SPARC   | SPP1     | TGFBI    | TMBIM6   |
| TMSB10  | UBC      | UMOD    | VEGFA    | VIM      | VWF      |

165

166

167

168

169

170

171

Next, in order to evaluate the biological significance of selected mRNAs, we determined the top 10 oncogenic signatures of the 72 genes reported by MSigDB (Table 2).

**Table 2.** The top 10 oncogenic signatures of the 72 genes reported by the MSigDB. #Genes (K): the number of genes in each overexpressed gene set. # Genes in overlap (k): overlaps with genes selected via the TD-based unsupervised FE method. .

| Gene Set Name<br>[# Genes (K)]       | Description                                                                                                             | #Genes in<br>overlap<br>(k) | p-value  | FDR q-<br>value |
|--------------------------------------|-------------------------------------------------------------------------------------------------------------------------|-----------------------------|----------|-----------------|
| CAMP_UP.V1_UP<br>[200]               | Genes up-regulated in primary thyrocyte cultures in response to cAMP signaling pathway activation by thyrotropin (TSH). | 7                           | 9.97 e-8 | 1.88 e-5        |
| SNF5_DN.V1_DN<br>[168]               | Genes down-regulated in MEF cells (embryonic fibroblasts) with knockout of SNF5 [Gene ID=6598] gene.                    | 6                           | 7.64 e-7 | 7.22 e-5        |
| ESC_V6.5_UP_<br>LATE.V1_UP<br>[188]  | Genes up-regulated during the late stages of differentiation of embryoid bodies from V6.5 embryonic stem cells.         | 6                           | 1.47 e-6 | 9.27 e-5        |
| ESC_V6.5_UP_<br>EARLY.V1_DN<br>[175] | Genes down-regulated during the early stages of differentiation of embryoid bodies from V6.5 embryonic stem cells.      | 5                           | 1.98 e-5 | 8.54 e-4        |
| ESC_J1_UP_<br>LATE.V1_UP<br>[189]    | Genes up-regulated during the late stages of differentiation of embryoid bodies from J1 embryonic stem cells.           | 5                           | 2.86 e-5 | 8.54 e-4        |
| SIRNA_EIF4GI_UP<br>[95]              | Genes up-regulated in MCF10A cells vs knockdown of the EIF4G1 [Gene ID=1981] gene by RNAi.                              | 4                           | 3.11 e-5 | 8.54 e-4        |
| P53_DN.V1_DN<br>[193]                | Genes down-regulated in the NCI-60 panel of cell lines with mutated TP53 [Gene ID=7157].                                | 5                           | 3.16 e-5 | 8.54 e-4        |
| MEL18_DN.V1_UP<br>[141]              | Genes up-regulated in DAOY cells (medulloblastoma) upon knockdown of PCGF2 [Gene ID=7703] gene by RNAi.                 | 4                           | 1.45 e-4 | 3.42 e-3        |
| LTE2_UP.V1_UP<br>[188]               | Genes up-regulated in MCF-7 cells (breast cancer) positive for ESR1                                                     | 4                           | 4.33 e-4 | 8.51 e-3        |

|                      |                                                                                                                         |   |         |          |
|----------------------|-------------------------------------------------------------------------------------------------------------------------|---|---------|----------|
|                      | [Gene ID=2099] MCF-7 cells (breast cancer) and long-term adapted for estrogen-independent growth.                       |   |         |          |
| RPS14_DN.V1_UP [190] | Genes up-regulated in CD34 <sup>+</sup> hematopoietic progenitor cells after knockdown of RPS14 [Gene ID=6208] by RNAi. | 4 | 4.5 e-4 | 8.51 e-3 |

172

173 The results of the top 10 REACTOME pathways reported by MSigDB are summarized in Table 3.

174

175 **Table 3.** The top 10 oncogenic signatures of the 72 genes reported by the MSigDB. #Genes (K): the  
 176 number of genes in each overexpressed gene set. # Genes in overlap (k): overlaps with genes selected  
 177 by TD-based unsupervised FE method.

| Gene Set Name<br>[# Genes (K)]                                                                                                            | Description                                                                                                                 | # Genes in<br>overlap (k) | p-value   | FDR<br>q-value |
|-------------------------------------------------------------------------------------------------------------------------------------------|-----------------------------------------------------------------------------------------------------------------------------|---------------------------|-----------|----------------|
| REACTOME_REGULATION_OF_INSULIN_LIKE_GR_GROWTH_FACTOR_IGF_TRANSPORT_AND_UPTAKE_BY_INSULIN_LIKE_GROWTH_FACTOR_BINDING_PROTEINS_IGFBPs [124] | Regulation of insulin-like growth factor (IGF) transport and uptake by insulin-like growth factor binding proteins (IGFBPs) | 12                        | 9.03 e-18 | 1.35 e-14      |
| REACTOME_CYTOKINE_SIGNALING_IN_IMMUNE_SYSTEM [856]                                                                                        | Cytokine signaling within the immune system                                                                                 | 18                        | 1.85 e-14 | 1.39 e-11      |
| REACTOME_RESPONSE_TO_ELEVATED_PLATELET_CYTOSOLIC_CA2PLUS [132]                                                                            | Response to elevated platelet cytosolic Ca <sup>2+</sup>                                                                    | 9                         | 3.42 e-12 | 1.71 e-9       |
| REACTOME_SIGNALING_BY_INTERLEUKINS [631]                                                                                                  | Signaling by interleukins                                                                                                   | 13                        | 1.53 e-10 | 4.86 e-8       |
| REACTOME_INNATE_IMMUNE_SYSTEM [1104]                                                                                                      | Innate immune system                                                                                                        | 16                        | 1.62 e-10 | 4.86 e-8       |
| REACTOME_PLATELET_ACTIVATION_SIGNALING_AND_AGGREGATION [260]                                                                              | Platelet activation, signaling and aggregation                                                                              | 9                         | 1.45 e-9  | 3.63 e-7       |
| REACTOME_ENDOSOMAL_VACUOLAR_PATHWAY [11]                                                                                                  | Endosomal/Vacuolar pathway                                                                                                  | 4                         | 3.63 e-9  | 7.78 e-7       |
| REACTOME_GLUONEOGENESIS [34]                                                                                                              | gluconeogenesis                                                                                                             | 5                         | 5.22 e-9  | 9.79 e-7       |
| REACTOME_POST_TRANSLATIONAL_PROTEIN_MODIFICATION [1429]                                                                                   | Post-translational protein modification                                                                                     | 16                        | 6.56 e-9  | 1.09 e-6       |
| REACTOME_DISEASE [1075]                                                                                                                   | Disease                                                                                                                     | 14                        | 1.02 e-8  | 1.53 e-6       |

178

179 These results suggest that the selected 72 mRNAs are likely related to oncogenesis. In order to further  
 180 confirm if these 72 mRNAs are related to kidney cancer, we checked if these genes were linked to

181 survival rates (Table 4). Among 72 mRNAs, 23 were significantly correlated with the survival of  
 182 kidney cancer patients. This also highlights the effectiveness of our analysis.

183 **Table 4.** Survival analysis of KIRC using OncoLnc (Anaya, 2016) (Kaplan plots are provided in the  
 184 supplementary materials)

| Gene   | Cox<br>Coeff. | P-value  | FDR<br>Corrected | Rank | Median<br>Expression | Mean<br>Expression | Kaplan plot |             | P-value  |
|--------|---------------|----------|------------------|------|----------------------|--------------------|-------------|-------------|----------|
|        |               |          |                  |      |                      |                    | Low<br>(%)  | High<br>(%) |          |
| VWF    | -0.3          | 1.90E-04 | 1.41E-03         | 2253 | 23278.72             | 25958.34           | 50          | 50          | 3.99E-03 |
| VEGFA  | 0.25          | 2.90E-03 | 1.19E-02         | 4064 | 31629.77             | 35072.27           | 70          | 30          | 2.32E-02 |
| TMBIM6 | -0.2          | 5.00E-03 | 1.82E-02         | 4583 | 27241.35             | 28733.19           | 40          | 60          | 1.34E-02 |
| PODXL  | -0.4          | 8.00E-06 | 1.22E-04         | 1092 | 6659.17              | 7271.06            | 50          | 50          | 1.36E-06 |
| PLVAP  | -0.2          | 7.10E-03 | 2.39E-02         | 4946 | 15470.76             | 17515.66           | 50          | 50          | 4.10E-04 |
| PLIN2  | -0.3          | 6.20E-04 | 3.56E-03         | 2902 | 18947.56             | 22839.08           | 50          | 50          | 1.71E-05 |
| PCK1   | -0.3          | 1.00E-04 | 8.58E-04         | 1931 | 1120.74              | 3037.73            | 50          | 50          | 7.84E-06 |
| NDRG1  | -0.2          | 1.20E-02 | 3.61E-02         | 5506 | 50127.14             | 51689.99           | 60          | 40          | 2.72E-02 |
| ITM2B  | -0.3          | 6.00E-04 | 3.47E-03         | 2880 | 34751.8              | 36807.63           | 50          | 50          | 1.36E-02 |
| HSPA8  | -0.3          | 1.20E-03 | 5.90E-03         | 3363 | 17668.96             | 18139.95           | 40          | 60          | 1.04E-02 |
| HLA-   |               |          |                  |      |                      |                    |             |             |          |
| DRA    | -0.2          | 3.80E-03 | 1.46E-02         | 4304 | 29068.65             | 32924.27           | 20          | 80          | 4.22E-02 |
| GATM   | -0.3          | 4.20E-04 | 2.61E-03         | 2683 | 5433.14              | 6800.94            | 50          | 50          | 3.09E-04 |
| CYFIP2 | -0.5          | 2.20E-09 | 4.32E-07         | 82   | 3482.26              | 4051.73            | 50          | 50          | 9.88E-08 |
| CDH16  | -0.2          | 4.40E-03 | 1.65E-02         | 4430 | 4093.23              | 4940.33            | 50          | 50          | 1.14E-03 |
| CCND1  | -0.2          | 3.00E-03 | 1.22E-02         | 4068 | 17278.68             | 19256.81           | 50          | 50          | 2.85E-04 |
| ATP5B  | -0.2          | 1.10E-02 | 3.37E-02         | 5360 | 11450.7              | 13211.83           | 30          | 70          | 2.59E-03 |
| ATP5A1 | -0.2          | 2.20E-03 | 9.54E-03         | 3812 | 7988.24              | 9278.65            | 50          | 50          | 2.86E-02 |
| ATP1B1 | -0.3          | 1.50E-03 | 7.03E-03         | 3514 | 18741.07             | 21002.32           | 50          | 50          | 3.90E-02 |
| ATP1A1 | -0.3          | 4.90E-05 | 4.98E-04         | 1634 | 12917.72             | 15392.31           | 40          | 60          | 2.34E-02 |
| AQP1   | -0.3          | 4.30E-05 | 4.52E-04         | 1580 | 16717.87             | 19036.22           | 50          | 50          | 3.11E-08 |
| APP    | -0.4          | 1.90E-05 | 2.36E-04         | 1329 | 32137.14             | 33051.3            | 50          | 50          | 1.33E-06 |
| ALDOB  | -0.3          | 4.40E-05 | 4.61E-04         | 1587 | 467.22               | 3374.03            | 50          | 50          | 3.27E-06 |
| AIF1L  | -0.2          | 1.50E-03 | 7.03E-03         | 3510 | 1984.01              | 2798.36            | 60          | 40          | 2.80E-02 |

185

186 We also evaluated the identified 11 miRNAs by DIANA-mirpath. Table 5 shows the enriched  
 187 disease-related KEGG pathways (P-value < 0.05). The renal cell carcinoma pathway is identified with  
 188 a significant P-value equal to 0.01613.

189

190 **Table 5.** The top 10 enriched KEGG pathways predicted by DIANA-mirpath for the 11 identified  
 191 miRNAs (P-values are corrected). The full list can be obtained from <http://snf-515788.vm.okeanos.grnet.gr/#mirnas=hsa-miR-210-3p;hsa-miR-210-5p;hsa-miR-891a-3p;hsa-miR-891a-5p;hsa-miR-200c-5p;hsa-miR-200c-5p;hsa-miR-141-5p;hsa-miR-141-3p;hsa-miR-122-3p;hsa-miR-122-5p;hsa-miR-155-3p;hsa-miR-155-5p;hsa-miR-508-3p;hsa-miR-508-5p;hsa-miR-514a-3p;hsa-miR-514a-5p;hsa-miR-184&methods=Tarbase;Tarbase;Tarbase;Tarbase;Tarbase;Tarbase;Tarbase;Tarbase;Tarbase;Tarbase;Tarbase;Tarbase;Tarbase;Tarbase;Tarbase;Tarbase;Tarbase;Tarbase;Tarbase;Tarbase;Tarbase;Tarbase&selection=0>  
 192  
 193  
 194  
 195  
 196  
 197

| KEGG pathway               | P-value    | #genes | #miRNAs |
|----------------------------|------------|--------|---------|
| Chronic myeloid leukemia   | 5.90E-08   | 39     | 6       |
| Proteoglycans in cancer    | 3.67E-06   | 72     | 8       |
| Prostate cancer            | 2.58E-05   | 43     | 7       |
| Pathways in cancer         | 3.10E-05   | 128    | 10      |
| Pancreatic cancer          | 3.94E-05   | 32     | 5       |
| Glioma                     | 9.09E-05   | 28     | 5       |
| Hepatitis B                | 9.11E-05   | 47     | 5       |
| Small cell lung cancer     | 0.0002621  | 38     | 5       |
| Non-small cell lung cancer | 0.0002975  | 24     | 4       |
| Colorectal cancer          | 0.0002975  | 28     | 7       |
| Endometrial cancer         | 0.0007913  | 23     | 6       |
| Viral carcinogenesis       | 0.0007913  | 59     | 8       |
| Bladder cancer             | 0.001004   | 20     | 5       |
| Melanoma                   | 0.01584    | 25     | 5       |
| Renal cell carcinoma       | 0.01613    | 27     | 5       |
| Hepatitis C                | 0.02652153 | 44     | 6       |

198

#### 199 4. Discussion

200 The top signature in Table 2 is related to the cAMP signaling pathway. Targeting the cAMP  
 201 pathway is an effective treatment for kidney cancer (Piazzon, Maisonneuve, Guilleret, Rotman, &  
 202 Constam, 2012; Torres & Harris, 2014). The second signature in Table 2 is the *Snf5* gene expression  
 203 profile of a murine model (Mouse Embryonic Fibroblast (MEF) cells) that closely resembles that of  
 204 human SNF5-deficient rhabdoid tumors (pediatric soft tissue sarcoma that arises in the kidney, the  
 205 liver, and the peripheral nerves) (Isakoff et al., 2005). Impairment of the SWI/SNF chromatin  
 206 remodeling complex plays an important role in the development and aggressiveness of clear cell  
 207 renal cell carcinoma (Sarnowska et al., 2017). The sixth signature in Table 2 comes from a study of the  
 208 effects of knockdown of the gene family of eukaryotic translation initiation factors (EIF) by RNAi in  
 209 MCF10A cells. EIF3b is a promising prognostic biomarker and a potential therapeutic target for patients  
 210 with clear cell renal cell carcinoma (Zang et al., 2017), and EIF4GI is a target for cancer therapeutics  
 211 (Jaiswal, Koul, Palanisamy, & Koul, 2019).

212 The top pathway in Table 3 is the 'Pathway of regulation of IGF activity by IGFBP'. Studies  
 213 show that insulin-like growth factors (IGFs) and insulin play a stimulatory role for renal cancer cells  
 214 (Brackowski, Bialozyt, Plato, Mazurek, & Brackowska, 2016; Solarek, Koper, Lewicki, Szczylik, &  
 215 Czarnecka, 2019). Patients with IGF-1 receptor overexpression have a 70% increased risk of death  
 216 (Tracz, Szczylik, Porta, & Czarnecka, 2016). Moreover, this overexpression has been shown to  
 217 increase kidney cancer risk in middle-aged male smokers (Major, Pollak, Snyder, Virtamo, & Albanes,  
 218 2010). The second pathway in Table 3 is 'Cytokine Signaling in Immune system'. Cytokines are  
 219 important biomolecules that play essential roles in tumor formation (Lee & Rhee, 2017) and they are  
 220 therapeutic targets (Doehn, Kausch, Melz, Behm, & Jocham, 2004; Macleod et al., 2015). The IL-6  
 221 cytokine family can serve as useful diagnostic and prognostic biomarkers. In fact, IL-6 is a potential  
 222 target in cancer therapy (Kaminska, Czarnecka, Escudier, Lian, & Szczylik, 2015; Unver & McAllister,  
 223 2018). Ishibashi et al., reported that IL-6 suppresses the expression of the cytokine signaling-3  
 224 (SOCS3) gene, and is associated with poor prognosis of kidney cancer patients (Ishibashi et al., 2018).



225 Table 4 shows the significant relationships between the predicted 23 mRNAs and the patients'  
 226 survival rates. For some of the 23 genes, patients cannot be divided equally based on expression of  
 227 considered genes in order to get significant P-values for the Kaplan-Meier plots. A majority of the  
 228 mRNAs (15 out of 23) are associated with P-values less than 0.05 with 50/50 divisions based on the  
 229 level of gene expression. Among the 16 KEGG pathways predicted by DIANA-mirpath (Table 5), 14  
 230 are directly related to cancers, except for Hepatitis B and Hepatitis C. Therefore, we correctly  
 231 identified miRNA signatures that are cancer-related.

232 In order to validate the robustness of our findings, we employed an independent dataset to  
 233 confirm that our results are independent of datasets to some extent. The alternative dataset was  
 234 downloaded from GEO (GSE16441). The procedures applied to analyze the GEO dataset are similar  
 235 to those applied to the dataset obtained from TCGA. The only difference is the number of samples,  
 236 miRNAs, and mRNAs. After repeating the same procedures, we realized that  $u_{l_1j}^{mRNA}$  and  $u_{l_3j}^{miRNA}$   
 237 ( $l_1 = l_3 = 2$ ) also varied between normal and tumor samples (Fig 1). P-values computed by the t-test  
 238 were  $6.74 \times 10^{-22}$  for mRNA and  $2.54 \times 10^{-18}$  for miRNA. In order to ascertain whether  $u_{2j}^{mRNA}$   
 239 and  $u_{2j}^{miRNA}$  are significantly correlated, we calculated the PCC between them, which was 0.931 (p-  
 240 value =  $1.58 \times 10^{-15}$ ), indicating that they are highly correlated.  
 241

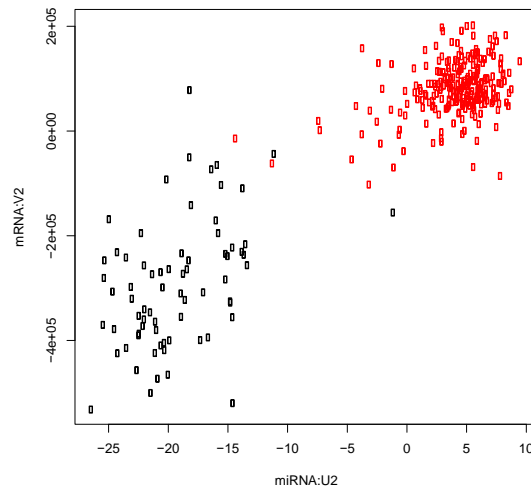

242  
 243  
 244 **Fig 1** Scatter plot between  $u_{l_1j}^{mRNA}$  (vertical axis) and  $u_{l_3j}^{miRNA}$  (horizontal axis). Black (red) open circle  
 245 corresponds to normal (tumor) tissue.  
 246

247 Next, we checked if the selected miRNAs and mRNAs were common between the TCGA and GEO  
 248 datasets. We identified three miRNAs – hsa-miR-141, hsa-miR-210, and hsa-miR-200c, which are  
 249 listed in Table 1. On the other hand, 209 genes were identified. After restricting genes included in  
 250 both TCGA and GEO datasets, we evaluated the overlap as the confusion matrix (Table 6).  
 251

252 Table 6. Confusion matrix between genes selected in TCGA and GEO dataset.

|      |              | GEO          |          |
|------|--------------|--------------|----------|
|      |              | Not selected | Selected |
| TCGA | Not selected | 17209        | 160      |
|      | Selected     | 60           | 11       |

253  
 254 The P-value determined using the Fisher exact test was  $8.97 \times 10^{-11}$  and the odds ratio was 19.7.  
 255 Therefore, the coincidence between selected genes in the TCGA and GEO datasets is significant and the  
 256 results obtained for TCGA are robust and not highly dependent upon specific samples.

257  
258 To test the superiority to the conventional method, we applied the t-test to the TCGA and GEO datasets.  
259 After applying the t-test, P-values were calculated and adjusted based on the BH criterion. Then, 13,895  
260 genes and 399 miRNAs for TCGA and 12,152 genes and 78 miRNAs for GEO were associated with  
261 adjusted P-values less than 0.01. Relative to the TD method, the t-test identified a larger number of  
262 genes and miRNAs using the P-values as criteria. If the top ranked (small enough or restricted) number  
263 of genes and miRNAs was selected by the t-test, the coincidence between TCGA and GEO might be  
264 compatible. Therefore, we selected the same number of genes and miRNAs by the t-test as those  
265 selected by TD. Only one miRNA and no genes were common between the TCGA and GEO datasets.  
266 Therefore, we determined that the t-test could identify less coincident sets of genes and miRNAs  
267 between TCGA and GEO. In conclusion, this strongly suggests that the proposed method is superior to  
268 the t-test.  
269

## 270 5. Conclusions

271 In this study, we applied the TD-based unsupervised FE method to the KIRC miRNA expression  
272 and gene expression data. The TD-based method can identify miRNA signatures with differential  
273 expression between normal tissues and tumors as well as significant correlations between the gene  
274 expression data. Selected mRNAs and miRNAs are not only mutually correlated, but are also  
275 significantly related to various aspects of cancers. This suggests that integrated analysis performed  
276 by TD-based unsupervised FE is an effective strategy, despite its simplicity to identify biologically  
277 significant pairs of miRNAs and mRNAs, which is not easy by other strategies.

278 **Supplementary Materials:** Supplementary figures. The results of the Kaplan-Meier plots of the 23 KIRC  
279 survival-associated genes by using OncoLnc.

280 **Author Contributions:** Ka-Lok Ng foresee the research, prepared the data, writing—original draft preparation,  
281 review and editing. Y-h Taguchi performed the formal analysis, writing—original draft preparation, review and  
282 editing.

283 **Conflicts of Interest:** The authors declare no conflict of interest.

## 284 References

- 285 Anaya, J. (2016). OncoLnc: linking TCGA survival data to mRNAs, miRNAs, and lncRNAs. *PeerJ Computer*  
286 *Science*, 2, e67. doi:10.7717/peerj-cs.67
- 287 Braczkowski, R., Bialozyt, M., Plato, M., Mazurek, U., & Braczkowska, B. (2016). Expression of insulin-like  
288 growth factor family genes in clear cell renal cell carcinoma. *Contemp Oncol (Pozn)*, 20(2), 130-136.  
289 doi:10.5114/wo.2016.58720
- 290 Doehn, C., Kausch, I., Melz, S., Behm, A., & Jocham, D. (2004). Cytokine and vaccine therapy of kidney cancer.  
291 *Expert Rev Anticancer Ther*, 4(6), 1097-1111. doi:10.1586/14737140.4.6.1097
- 292 Feinberg, A. P., & Vogelstein, B. (1983). Hypomethylation distinguishes genes of some human cancers from  
293 their normal counterparts. *Nature*, 301(5895), 89-92. doi:10.1038/301089a0
- 294 Hanahan, D., & Weinberg, R. A. (2011). Hallmarks of cancer: the next generation. *Cell*, 144(5), 646-674.  
295 doi:10.1016/j.cell.2011.02.013
- 296 Inamoto, T., Uehara, H., Akao, Y., Ibuki, N., Komura, K., Takahara, K., . . . Azuma, H. (2018). A Panel of  
297 MicroRNA Signature as a Tool for Predicting Survival of Patients with Urothelial Carcinoma of the  
298 Bladder. *Dis Markers*, 2018, 5468672. doi:10.1155/2018/5468672
- 299 Isakoff, M. S., Sansam, C. G., Tamayo, P., Subramanian, A., Evans, J. A., Fillmore, C. M., . . . Roberts, C. W.  
300 (2005). Inactivation of the Snf5 tumor suppressor stimulates cell cycle progression and cooperates

- 301 with p53 loss in oncogenic transformation. *Proc Natl Acad Sci U S A*, 102(49), 17745-17750.  
302 doi:10.1073/pnas.0509014102
- 303 Ishibashi, K., Koguchi, T., Matsuoka, K., Onagi, A., Tanji, R., Takinami-Honda, R., . . . Kojima, Y. (2018).  
304 Interleukin-6 induces drug resistance in renal cell carcinoma. *Fukushima J Med Sci*, 64(3), 103-110.  
305 doi:10.5387/fms.2018-15
- 306 Jaiswal, P. K., Koul, S., Palanisamy, N., & Koul, H. K. (2019). Eukaryotic Translation Initiation Factor 4 Gamma  
307 1 (EIF4G1): a target for cancer therapeutic intervention? *Cancer Cell Int*, 19, 224. doi:10.1186/s12935-  
308 019-0947-2
- 309 Kaminska, K., Czarnecka, A. M., Escudier, B., Lian, F., & Szczylik, C. (2015). Interleukin-6 as an emerging  
310 regulator of renal cell cancer. *Urol Oncol*, 33(11), 476-485. doi:10.1016/j.urolonc.2015.07.010
- 311 Lee, M., & Rhee, I. (2017). Cytokine Signaling in Tumor Progression. *Immune Netw*, 17(4), 214-227.  
312 doi:10.4110/in.2017.17.4.214
- 313 Liberzon, A., Birger, C., Thorvaldsdottir, H., Ghandi, M., Mesirov, J. P., & Tamayo, P. (2015). The Molecular  
314 Signatures Database (MSigDB) hallmark gene set collection. *Cell Syst*, 1(6), 417-425.  
315 doi:10.1016/j.cels.2015.12.004
- 316 Lokeshwar, S. D., Talukder, A., Yates, T. J., Hennig, M. J. P., Garcia-Roig, M., Lahorewala, S. S., . . . Lokeshwar,  
317 V. B. (2018). Molecular Characterization of Renal Cell Carcinoma: A Potential Three-MicroRNA  
318 Prognostic Signature. *Cancer Epidemiol Biomarkers Prev*, 27(4), 464-472. doi:10.1158/1055-9965.Epi-17-  
319 0700
- 320 Luo, Y., Chen, L., Wang, G., Xiao, Y., Ju, L., & Wang, X. (2019). Identification of a three-miRNA signature as a  
321 novel potential prognostic biomarker in patients with clear cell renal cell carcinoma. *J Cell Biochem*,  
322 120(8), 13751-13764. doi:10.1002/jcb.28648
- 323 Macleod, L. C., Tykodi, S. S., Holt, S. K., Wright, J. L., Lin, D. W., Tretiakova, M. S., . . . Gore, J. L. (2015). Trends  
324 in Metastatic Kidney Cancer Survival From the Cytokine to the Targeted Therapy Era. *Urology*, 86(2),  
325 262-268. doi:10.1016/j.urology.2015.05.008
- 326 Major, J. M., Pollak, M. N., Snyder, K., Virtamo, J., & Albanes, D. (2010). Insulin-like growth factors and risk of  
327 kidney cancer in men. *Br J Cancer*, 103(1), 132-135. doi:10.1038/sj.bjc.6605722
- 328 Medina, P. P., & Slack, F. J. (2008). microRNAs and cancer: an overview. *Cell Cycle*, 7(16), 2485-2492.  
329 doi:10.4161/cc.7.16.6453
- 330 Piazzon, N., Maisonneuve, C., Guilleret, I., Rotman, S., & Constam, D. B. (2012). Bicc1 links the regulation of  
331 cAMP signaling in polycystic kidneys to microRNA-induced gene silencing. *J Mol Cell Biol*, 4(6), 398-  
332 408. doi:10.1093/jmcb/mjs027
- 333 Rabanser, S., Shchur, O., & Günnemann, S. (2017). Introduction to Tensor Decompositions and their  
334 Applications in Machine Learning.
- 335 Rouhi, A., Mager, D. L., Humphries, R. K., & Kuchenbauer, F. (2008). MiRNAs, epigenetics, and cancer. *Mamm*  
336 *Genome*, 19(7-8), 517-525. doi:10.1007/s00335-008-9133-x
- 337 Sarnowska, E., Szymanski, M., Rusetska, N., Ligaj, M., Jancewicz, I., Cwiek, P., . . . Sarnowski, T. J. (2017).  
338 Evaluation of the role of downregulation of SNF5/INI1 core subunit of SWI/SNF complex in clear cell  
339 renal cell carcinoma development. *Am J Cancer Res*, 7(11), 2275-2289.
- 340 Shi, X. H., Li, X., Zhang, H., He, R. Z., Zhao, Y., Zhou, M., . . . Qin, R. Y. (2018). A Five-microRNA Signature for  
341 Survival Prognosis in Pancreatic Adenocarcinoma based on TCGA Data. *Sci Rep*, 8(1), 7638.  
342 doi:10.1038/s41598-018-22493-5

- 343 Solarek, W., Koper, M., Lewicki, S., Szczylik, C., & Czarnecka, A. M. (2019). Insulin and insulin-like growth  
344 factors act as renal cell cancer intratumoral regulators. *J Cell Commun Signal*, 13(3), 381-394.  
345 doi:10.1007/s12079-019-00512-y
- 346 Taguchi, Y. (2017, 23-25 Oct. 2017). *One-class Differential Expression Analysis using Tensor Decomposition-based*  
347 *Unsupervised Feature Extraction Applied to Integrated Analysis of Multiple Omics Data from 26 Lung*  
348 *Adenocarcinoma Cell Lines*. Paper presented at the 2017 IEEE 17th International Conference on  
349 Bioinformatics and Bioengineering (BIBE).
- 350 Taguchi, Y., & Ng, K. (2018, 29-31 Oct. 2018). [Regular Paper] *Tensor Decomposition-Based Unsupervised Feature*  
351 *Extraction for Integrated Analysis of TCGA Data on MicroRNA Expression and Promoter Methylation of*  
352 *Genes in Ovarian Cancer*. Paper presented at the 2018 IEEE 18th International Conference on  
353 Bioinformatics and Bioengineering (BIBE).
- 354 Taguchi, Y.-h. (2019a). *Multimiomics Data Analysis Using Tensor Decomposition Based Unsupervised Feature*  
355 *Extraction –Comparison with DIABLO–* (Vol. 11643): Springer.
- 356 Taguchi, Y.-h. (2019b). *Tensor Decomposition Based Unsupervised Feature Extraction Applied to Bioinformatics.*  
357 *Application of Omics, AI and Blockchain in Bioinformatics Research* (J. J. P. T. a. K.-L. Ng Ed.): World  
358 Scientific Publisher.
- 359 Taguchi, Y.-h. (2019c). *Unsupervised Feature Extraction Applied to Bioinformatics: A PCA Based and TD Based*  
360 *Approach*: Springer International.
- 361 Taguchi, Y.-h., & Turki, T. (2019). Neurological disorder drug discovery from gene expression with tensor  
362 decomposition. *Current Pharmaceutical Design*, 704163. doi:10.1101/704163
- 363 Taguchi, Y. H. (2017a). Identification of candidate drugs using tensor-decomposition-based unsupervised  
364 feature extraction in integrated analysis of gene expression between diseases and DrugMatrix  
365 datasets. *Sci Rep*, 7(1), 13733. doi:10.1038/s41598-017-13003-0
- 366 Taguchi, Y. H. (2017b). Tensor decomposition-based unsupervised feature extraction applied to matrix  
367 products for multi-view data processing. *PLoS One*, 12(8), e0183933. doi:10.1371/journal.pone.0183933
- 368 Taguchi, Y. H. (2017c). Tensor decomposition-based unsupervised feature extraction identifies candidate genes  
369 that induce post-traumatic stress disorder-mediated heart diseases. *BMC Med Genomics*, 10(Suppl 4),  
370 67. doi:10.1186/s12920-017-0302-1
- 371 Taguchi, Y. H. (2018a). Correction: Tensor decomposition-based unsupervised feature extraction applied to  
372 matrix products for multi-view data processing. *PLoS One*, 13(7), e0200451.  
373 doi:10.1371/journal.pone.0200451
- 374 Taguchi, Y. H. (2018b). Tensor decomposition-based and principal-component-analysis-based unsupervised  
375 feature extraction applied to the gene expression and methylation profiles in the brains of social  
376 insects with multiple castes. *BMC Bioinformatics*, 19(Suppl 4), 99. doi:10.1186/s12859-018-2068-7
- 377 Taguchi, Y. H. (2018c). Tensor Decomposition-Based Unsupervised Feature Extraction Can Identify the  
378 Universal Nature of Sequence-Nonspecific Off-Target Regulation of mRNA Mediated by MicroRNA  
379 Transfection. *Cells*, 7(6). doi:10.3390/cells7060054
- 380 Taguchi, Y. H. (2019). Drug candidate identification based on gene expression of treated cells using tensor  
381 decomposition-based unsupervised feature extraction for large-scale data. *BMC Bioinformatics*,  
382 19(Suppl 13), 388. doi:10.1186/s12859-018-2395-8
- 383 Taguchi, Y. H., & Turki, T. (2019). Tensor Decomposition-Based Unsupervised Feature Extraction Applied to  
384 Single-Cell Gene Expression Analysis. *Front Genet*, 10, 864. doi:10.3389/fgene.2019.00864

- 385 Torres, V. E., & Harris, P. C. (2014). Strategies targeting cAMP signaling in the treatment of polycystic kidney  
386 disease. *J Am Soc Nephrol*, 25(1), 18-32. doi:10.1681/asn.2013040398
- 387 Tracz, A. F., Szczylik, C., Porta, C., & Czarnecka, A. M. (2016). Insulin-like growth factor-1 signaling in renal  
388 cell carcinoma. *BMC Cancer*, 16, 453. doi:10.1186/s12885-016-2437-4
- 389 Unver, N., & McAllister, F. (2018). IL-6 family cytokines: Key inflammatory mediators as biomarkers and  
390 potential therapeutic targets. *Cytokine & Growth Factor Reviews*, 41, 10-17.  
391 doi:<https://doi.org/10.1016/j.cytogfr.2018.04.004>
- 392 Vargas-Rondon, N., Villegas, V. E., & Rondon-Lagos, M. (2017). The Role of Chromosomal Instability in Cancer  
393 and Therapeutic Responses. *Cancers (Basel)*, 10(1). doi:10.3390/cancers10010004
- 394 Vlachos, I. S., Zagganas, K., Paraskevopoulou, M. D., Georgakilas, G., Karagkouni, D., Vergoulis, T., . . .  
395 Hatzigeorgiou, A. G. (2015). DIANA-miRPath v3.0: deciphering microRNA function with  
396 experimental support. *Nucleic Acids Res*, 43(W1), W460-466. doi:10.1093/nar/gkv403
- 397 Xie, M., Lv, Y., Liu, Z., Zhang, J., Liang, C., Liao, X., . . . Li, Y. (2018). Identification and validation of a four-  
398 miRNA (miRNA-21-5p, miRNA-9-5p, miR-149-5p, and miRNA-30b-5p) prognosis signature in clear  
399 cell renal cell carcinoma. *Cancer Manag Res*, 10, 5759-5766. doi:10.2147/cmar.S187109
- 400 Yu, Y., Feng, X., & Cang, S. (2018). A two-microRNA signature as a diagnostic and prognostic marker of  
401 pancreatic adenocarcinoma. *Cancer Manag Res*, 10, 1507-1515. doi:10.2147/cmar.S158712
- 402 Zang, Y., Zhang, X., Yan, L., Gu, G., Li, D., Zhang, Y., . . . Xu, Z. (2017). Eukaryotic Translation Initiation Factor  
403 3b is both a Promising Prognostic Biomarker and a Potential Therapeutic Target for Patients with  
404 Clear Cell Renal Cell Carcinoma. *J Cancer*, 8(15), 3049-3061. doi:10.7150/jca.19594
- 405 Zhang, W., Dahlberg, J. E., & Tam, W. (2007). MicroRNAs in tumorigenesis: a primer. *Am J Pathol*, 171(3), 728-  
406 738. doi:10.2353/ajpath.2007.070070
- 407 Zhou, H., Tang, K., Xiao, H., Zeng, J., Guan, W., Guo, X., . . . Ye, Z. (2015). A panel of eight-miRNA signature as  
408 a potential biomarker for predicting survival in bladder cancer. *J Exp Clin Cancer Res*, 34, 53.  
409 doi:10.1186/s13046-015-0167-0  
410
